# Supplementary material for: The gut of the finch: uniqueness of the gut microbiome of the Galápagos vampire finch
Source: PubMed Central journal article supplement (PMC6146768; doi:10.1186/s40168-018-0555-8), 2018-09-19
Supplement: 40168_2018_555_MOESM5_ESM.pdf [file 40168_2018_555_MOESM5_ESM.pdf]

Table S3.

| A.                                                                              |                        | Season |       |                |       | Diet   |       |                |       | Vampire |       |                |       |
|---------------------------------------------------------------------------------|------------------------|--------|-------|----------------|-------|--------|-------|----------------|-------|---------|-------|----------------|-------|
|                                                                                 |                        | ANOSIM |       | Adonis         |       | ANOSIM |       | Adonis         |       | ANOSIM  |       | Adonis         |       |
|                                                                                 |                        | R      | p     | R <sup>2</sup> | p     | R      | p     | R <sup>2</sup> | p     | R       | p     | R <sup>2</sup> | p     |
| 1. Full Dataset<br>N = 113                                                      | Weighted Bray-Curtis   | 0.27   | 0.001 | 0.041          | 0.001 | 0.15   | 0.001 | 0.010          | 0.056 | 0.23    | 0.001 | 0.051          | 0.001 |
|                                                                                 | Unweighted Bray-Curtis | 0.20   | 0.001 | 0.038          | 0.001 | 0.19   | 0.001 | 0.009          | 0.12  | 0.31    | 0.001 | 0.057          | 0.001 |
|                                                                                 | Weighted UniFrac       | 0.30   | 0.001 | 0.073          | 0.001 | 0.12   | 0.001 | 0.008          | 0.18  | 0.16    | 0.001 | 0.060          | 0.001 |
|                                                                                 | Unweighted UniFrac     | 0.21   | 0.001 | 0.029          | 0.001 | 0.26   | 0.001 | 0.012          | 0.013 | 0.38    | 0.001 | 0.050          | 0.001 |
| 2. November samples<br>N = 60                                                   | Weighted Bray-Curtis   |        |       |                |       | 0.33   | 0.001 | 0.017          | 0.19  | 0.35    | 0.001 | 0.11           | 0.001 |
|                                                                                 | Unweighted Bray-Curtis |        |       |                |       | 0.32   | 0.001 | 0.017          | 0.21  | 0.35    | 0.001 | 0.12           | 0.001 |
|                                                                                 | Weighted UniFrac       |        |       |                |       | 0.30   | 0.001 | 0.016          | 0.26  | 0.29    | 0.001 | 0.14           | 0.001 |
|                                                                                 | Unweighted UniFrac     |        |       |                |       | 0.41   | 0.001 | 0.020          | 0.064 | 0.43    | 0.001 | 0.10           | 0.001 |
| 3a. No <i>G. septentrionalis</i> , balanced by season<br>N = 82                 | Weighted Bray-Curtis   | 0.17   | 0.001 | 0.056          | 0.001 | -0.07  | 0.95  | 0.018          | 0.076 |         |       |                |       |
|                                                                                 | Unweighted Bray-Curtis | 0.14   | 0.001 | 0.049          | 0.001 | -0.05  | 0.88  | 0.017          | 0.15  |         |       |                |       |
|                                                                                 | Weighted UniFrac       | 0.17   | 0.001 | 0.078          | 0.001 | -0.05  | 0.87  | 0.015          | 0.28  |         |       |                |       |
|                                                                                 | Unweighted UniFrac     | 0.13   | 0.001 | 0.036          | 0.001 | -0.03  | 0.75  | 0.02           | 0.01  |         |       |                |       |
| 3b. No <i>G. septentrionalis</i> , balanced season & diet<br>N = 40             | Weighted Bray-Curtis   | 0.17   | 0.001 | 0.068          | 0.002 | 0.019  | 0.32  | 0.032          | 0.24  |         |       |                |       |
|                                                                                 | Unweighted Bray-Curtis | 0.15   | 0.002 | 0.063          | 0.002 | 0.022  | 0.27  | 0.031          | 0.27  |         |       |                |       |
|                                                                                 | Weighted UniFrac       | 0.15   | 0.009 | 0.087          | 0.004 | 0.008  | 0.34  | 0.028          | 0.31  |         |       |                |       |
|                                                                                 | Unweighted UniFrac     | 0.14   | 0.002 | 0.052          | 0.001 | 0.062  | 0.10  | 0.034          | 0.053 |         |       |                |       |
| 4. Herbivorous finches, balanced by season<br>N = 50                            | Weighted Bray-Curtis   | 0.21   | 0.001 | 0.074          | 0.001 |        |       |                |       |         |       |                |       |
|                                                                                 | Unweighted Bray-Curtis | 0.17   | 0.001 | 0.068          | 0.001 |        |       |                |       |         |       |                |       |
|                                                                                 | Weighted UniFrac       | 0.24   | 0.001 | 0.11           | 0.001 |        |       |                |       |         |       |                |       |
|                                                                                 | Unweighted UniFrac     | 0.16   | 0.001 | 0.050          | 0.001 |        |       |                |       |         |       |                |       |
| 5. Insectivorous finches, balanced by season<br>N = 20                          | Weighted Bray-Curtis   | 0.076  | 0.17  | 0.077          | 0.12  |        |       |                |       |         |       |                |       |
|                                                                                 | Unweighted Bray-Curtis | 0.072  | 0.18  | 0.071          | 0.16  |        |       |                |       |         |       |                |       |
|                                                                                 | Weighted UniFrac       | 0.042  | 0.23  | 0.074          | 0.18  |        |       |                |       |         |       |                |       |
|                                                                                 | Unweighted UniFrac     | 0.11   | 0.09  | 0.075          | 0.082 |        |       |                |       |         |       |                |       |
| 6a. <i>G. fuliginosa</i> , balanced by season<br>N = 22                         | Weighted Bray-Curtis   | 0.38   | 0.001 | 0.12           | 0.002 |        |       |                |       |         |       |                |       |
|                                                                                 | Unweighted Bray-Curtis | 0.38   | 0.001 | 0.12           | 0.002 |        |       |                |       |         |       |                |       |
|                                                                                 | Weighted UniFrac       | 0.45   | 0.001 | 0.17           | 0.005 |        |       |                |       |         |       |                |       |
|                                                                                 | Unweighted UniFrac     | 0.31   | 0.002 | 0.086          | 0.006 |        |       |                |       |         |       |                |       |
| 7a. <i>G. fuliginosa</i> & <i>G. fortis</i> , balanced by season<br>N = 30      | Weighted Bray-Curtis   | 0.28   | 0.001 | 0.11           | 0.001 |        |       |                |       |         |       |                |       |
|                                                                                 | Unweighted Bray-Curtis | 0.26   | 0.001 | 0.11           | 0.001 |        |       |                |       |         |       |                |       |
|                                                                                 | Weighted UniFrac       | 0.35   | 0.001 | 0.18           | 0.001 |        |       |                |       |         |       |                |       |
|                                                                                 | Unweighted UniFrac     | 0.23   | 0.001 | 0.078          | 0.001 |        |       |                |       |         |       |                |       |
| 8. <i>G. fuliginosa</i> on San Cristobal Island, balanced by season<br>N = 14   | Weighted Bray-Curtis   | 0.46   | 0.003 | 0.20           | 0.004 |        |       |                |       |         |       |                |       |
|                                                                                 | Unweighted Bray-Curtis | 0.43   | 0.003 | 0.19           | 0.003 |        |       |                |       |         |       |                |       |
|                                                                                 | Weighted UniFrac       | 0.47   | 0.007 | 0.27           | 0.006 |        |       |                |       |         |       |                |       |
|                                                                                 | Unweighted UniFrac     | 0.40   | 0.005 | 0.15           | 0.005 |        |       |                |       |         |       |                |       |
| 9. No <i>G. septentrionalis</i> , dry season, balanced by diet<br>N = 32        | Weighted Bray-Curtis   |        |       |                |       | 0.018  | 0.30  | 0.036          | 0.32  |         |       |                |       |
|                                                                                 | Unweighted Bray-Curtis |        |       |                |       | 0.011  | 0.38  | 0.036          | 0.36  |         |       |                |       |
|                                                                                 | Weighted UniFrac       |        |       |                |       | 0.015  | 0.33  | 0.044          | 0.21  |         |       |                |       |
|                                                                                 | Unweighted UniFrac     |        |       |                |       | 0.028  | 0.24  | 0.039          | 0.22  |         |       |                |       |
| 10. No <i>G. septentrionalis</i> , wet season, balanced diet<br>N = 20          | Weighted Bray-Curtis   |        |       |                |       | 0.012  | 0.43  | 0.062          | 0.33  |         |       |                |       |
|                                                                                 | Unweighted Bray-Curtis |        |       |                |       | 0.044  | 0.28  | 0.063          | 0.28  |         |       |                |       |
|                                                                                 | Weighted UniFrac       |        |       |                |       | 0.013  | 0.40  | 0.054          | 0.42  |         |       |                |       |
|                                                                                 | Unweighted UniFrac     |        |       |                |       | 0.10   | 0.12  | 0.075          | 0.075 |         |       |                |       |
| 11. Herbivores and insectivores, Santa Cruz, wet season, unbalanced**<br>N = 10 | Weighted Bray-Curtis   |        |       |                |       | 0.75   | 0.005 | -              | -     |         |       |                |       |
|                                                                                 | Unweighted Bray-Curtis |        |       |                |       | 0.42   | 0.017 | -              | -     |         |       |                |       |
|                                                                                 | Weighted UniFrac       |        |       |                |       | 0.24   | 0.079 | -              | -     |         |       |                |       |
|                                                                                 | Unweighted UniFrac     |        |       |                |       | 0.35   | 0.019 | -              | -     |         |       |                |       |
| 12a. Ground finches during the dry season, balanced by diet**<br>N = 18         | Weighted Bray-Curtis   |        |       |                |       | 0.11   | 0.16  | 0.087          | 0.067 |         |       |                |       |
|                                                                                 | Unweighted Bray-Curtis |        |       |                |       | 0.14   | 0.057 | 0.095          | 0.031 |         |       |                |       |
|                                                                                 | Weighted UniFrac       |        |       |                |       | 0.15   | 0.093 | 0.14           | 0.020 |         |       |                |       |
|                                                                                 | Unweighted UniFrac     |        |       |                |       | 0.18   | 0.024 | 0.093          | 0.007 |         |       |                |       |
| 13a. Dry season finches, balanced by vampire<br>N = 62                          | Weighted Bray-Curtis   |        |       |                |       | 0.32   | 0.001 | 0.016          | 0.35  | 0.34    | 0.001 | 0.10           | 0.001 |
|                                                                                 | Unweighted Bray-Curtis |        |       |                |       | 0.32   | 0.001 | 0.016          | 0.42  | 0.33    | 0.001 | 0.11           | 0.001 |
|                                                                                 | Weighted UniFrac       |        |       |                |       | 0.25   | 0.001 | 0.018          | 0.34  | 0.23    | 0.001 | 0.090          | 0.001 |
|                                                                                 | Unweighted UniFrac     |        |       |                |       | 0.38   | 0.001 | 0.017          | 0.27  | 0.41    | 0.001 | 0.095          | 0.001 |
| 13b. Dry season finches, balanced by vampire<br>N = 20                          | Weighted Bray-Curtis   |        |       |                |       | 0.33   | 0.001 | 0.048          | 0.49  | 0.38    | 0.003 | 0.15           | 0.003 |
|                                                                                 | Unweighted Bray-Curtis |        |       |                |       | 0.36   | 0.001 | 0.051          | 0.46  | 0.39    | 0.002 | 0.15           | 0.003 |
|                                                                                 | Weighted UniFrac       |        |       |                |       | 0.28   | 0.001 | 0.056          | 0.36  | 0.28    | 0.019 | 0.14           | 0.016 |
|                                                                                 | Unweighted UniFrac     |        |       |                |       | 0.42   | 0.001 | 0.055          | 0.35  | 0.45    | 0.003 | 0.14           | 0.016 |
| 14. Feather isotope finches, dry season, balanced by vampire<br>N = 30          | Weighted Bray-Curtis   |        |       |                |       |        |       |                |       | 0.30    | 0.001 | 0.14           | 0.001 |
|                                                                                 | Unweighted Bray-Curtis |        |       |                |       |        |       |                |       | 0.29    | 0.001 | 0.14           | 0.001 |
|                                                                                 | Weighted UniFrac       |        |       |                |       |        |       |                |       | 0.18    | 0.002 | 0.12           | 0.002 |
|                                                                                 | Unweighted UniFrac     |        |       |                |       |        |       |                |       | 0.34    | 0.001 | 0.12           | 0.002 |
| 15. Three ex- <i>G. difficilis</i> , balanced by vampire<br>N = 18              | Weighted Bray-Curtis   |        |       |                |       |        |       |                |       | 0.57    | 0.001 | 0.20           | 0.001 |
|                                                                                 | Unweighted Bray-Curtis |        |       |                |       |        |       |                |       | 0.58    | 0.001 | 0.22           | 0.001 |
|                                                                                 | Weighted UniFrac       |        |       |                |       |        |       |                |       | 0.46    | 0.001 | 0.23           | 0.001 |
|                                                                                 | Unweighted UniFrac     |        |       |                |       |        |       |                |       | 0.69    | 0.001 | 0.19           | 0.001 |

| B.                                                                             |                        | Species |       |                |       | Island |       |                |       | Latitude |       |                |       |
|--------------------------------------------------------------------------------|------------------------|---------|-------|----------------|-------|--------|-------|----------------|-------|----------|-------|----------------|-------|
|                                                                                |                        | ANOSIM  |       | Adonis         |       | ANOSIM |       | Adonis         |       | ANOSIM   |       | Adonis         |       |
|                                                                                |                        | R       | p     | R <sup>2</sup> | p     | R      | p     | R <sup>2</sup> | p     | R        | p     | R <sup>2</sup> | p     |
| 1. Full Dataset                                                                | Weighted Bray-Curtis   | 0.27    | 0.001 | 0.077          | 0.003 | 0.21   | 0.001 | 0.078          | 0.001 | 0.14     | 0.001 | 0.048          | 0.001 |
| N = 113                                                                        | Unweighted Bray-Curtis | 0.27    | 0.001 | 0.076          | 0.002 | 0.24   | 0.001 | 0.077          | 0.001 | 0.16     | 0.001 | 0.050          | 0.001 |
|                                                                                | Weighted UniFrac       | 0.24    | 0.001 | 0.073          | 0.019 | 0.17   | 0.001 | 0.082          | 0.001 | 0.097    | 0.001 | 0.051          | 0.001 |
|                                                                                | Unweighted UniFrac     | 0.34    | 0.001 | 0.080          | 0.001 | 0.27   | 0.001 | 0.062          | 0.001 | 0.19     | 0.001 | 0.045          | 0.001 |
| 2. November samples                                                            | Weighted Bray-Curtis   | 0.40    | 0.001 | 0.11           | 0.004 | 0.36   | 0.001 | 0.072          | 0.001 | -0.01    | 0.50  | 0.024          | 0.028 |
| N = 60                                                                         | Unweighted Bray-Curtis | 0.38    | 0.001 | 0.11           | 0.001 | 0.38   | 0.001 | 0.079          | 0.001 | -0.01    | 0.56  | 0.024          | 0.027 |
|                                                                                | Weighted UniFrac       | 0.36    | 0.001 | 0.090          | 0.051 | 0.35   | 0.001 | 0.086          | 0.001 | -0.04    | 0.62  | 0.025          | 0.036 |
|                                                                                | Unweighted UniFrac     | 0.45    | 0.001 | 0.098          | 0.003 | 0.43   | 0.001 | 0.086          | 0.001 | 0.058    | 0.24  | 0.026          | 0.009 |
| 3a. No <i>G. septentrionalis</i> , balanced by season                          | Weighted Bray-Curtis   | -0.01   | 0.52  | 0.15           | 0.001 | 0.052  | 0.090 | 0.070          | 0.001 |          |       |                |       |
| N = 82                                                                         | Unweighted Bray-Curtis | 0.030   | 0.30  | 0.15           | 0.001 | 0.051  | 0.092 | 0.064          | 0.002 |          |       |                |       |
|                                                                                | Weighted UniFrac       | -0.01   | 0.54  | 0.16           | 0.001 | 0.037  | 0.15  | 0.072          | 0.003 |          |       |                |       |
|                                                                                | Unweighted UniFrac     | 0.070   | 0.11  | 0.14           | 0.001 | 0.034  | 0.17  | 0.060          | 0.002 |          |       |                |       |
| 6a. <i>G. fuliginosa</i> , balanced by season                                  | Weighted Bray-Curtis   |         |       |                |       | 0.10   | 0.21  | 0.12           | 0.05  |          |       |                |       |
| N = 22                                                                         | Unweighted Bray-Curtis |         |       |                |       | 0.10   | 0.20  | 0.11           | 0.09  |          |       |                |       |
|                                                                                | Weighted UniFrac       |         |       |                |       | 0.06   | 0.30  | 0.10           | 0.21  |          |       |                |       |
|                                                                                | Unweighted UniFrac     |         |       |                |       | 0.11   | 0.15  | 0.11           | 0.08  |          |       |                |       |
| 6b. <i>G. fuliginosa</i> , balanced by island*                                 | Weighted Bray-Curtis   |         |       |                |       | 0.35   | 0.07  | 0.23           | 0.06  |          |       |                |       |
| N = 8                                                                          | Unweighted Bray-Curtis |         |       |                |       | 0.37   | 0.09  | 0.23           | 0.07  |          |       |                |       |
|                                                                                | Weighted UniFrac       |         |       |                |       | 0.35   | 0.10  | 0.25           | 0.11  |          |       |                |       |
|                                                                                | Unweighted UniFrac     |         |       |                |       | 0.30   | 0.13  | 0.19           | 0.11  |          |       |                |       |
| 7b. <i>G. fuliginosa</i> & <i>G. fortis</i> , balanced by species              | Weighted Bray-Curtis   | 0       | 0.48  | 0.048          | 0.29  |        |       |                |       |          |       |                |       |
| N = 22                                                                         | Unweighted Bray-Curtis | 0.020   | 0.36  | 0.052          | 0.21  |        |       |                |       |          |       |                |       |
|                                                                                | Weighted UniFrac       | 0.049   | 0.22  | 0.057          | 0.17  |        |       |                |       |          |       |                |       |
|                                                                                | Unweighted UniFrac     | 0.040   | 0.27  | 0.070          | 0.20  |        |       |                |       |          |       |                |       |
| 7c. <i>G. fuliginosa</i> & <i>G. fortis</i> , balanced by island               | Weighted Bray-Curtis   |         |       |                |       | 0.060  | 0.15  | 0.060          | 0.066 |          |       |                |       |
| N = 24                                                                         | Unweighted Bray-Curtis |         |       |                |       | 0.031  | 0.28  | 0.054          | 0.12  |          |       |                |       |
|                                                                                | Weighted UniFrac       |         |       |                |       | 0.038  | 0.22  | 0.045          | 0.18  |          |       |                |       |
|                                                                                | Unweighted UniFrac     |         |       |                |       | 0.058  | 0.20  | 0.054          | 0.11  |          |       |                |       |
| 12b. Ground finches during the dry season, balanced by species**               | Weighted Bray-Curtis   | 0.33    | 0.016 | 0.37           | 0.008 |        |       |                |       |          |       |                |       |
| N = 15 (n=3 x 5 sp.)                                                           | Unweighted Bray-Curtis | 0.35    | 0.008 | 0.39           | 0.002 |        |       |                |       |          |       |                |       |
|                                                                                | Weighted UniFrac       | 0.32    | 0.027 | 0.41           | 0.010 |        |       |                |       |          |       |                |       |
|                                                                                | Unweighted UniFrac     | 0.28    | 0.030 | 0.35           | 0.004 |        |       |                |       |          |       |                |       |
| 12c. Ground finches during the dry season, balanced by island**                | Weighted Bray-Curtis   |         |       |                |       | 0.37   | 0.001 | 0.25           | 0.001 | 0.20     | 0.005 | -              | -     |
| N = 24 (n=6 x 4 islands)                                                       | Unweighted Bray-Curtis |         |       |                |       | 0.34   | 0.001 | 0.26           | 0.001 | 0.24     | 0.001 | -              | -     |
|                                                                                | Weighted UniFrac       |         |       |                |       | 0.42   | 0.001 | 0.35           | 0.001 | 0.22     | 0.005 | -              | -     |
|                                                                                | Unweighted UniFrac     |         |       |                |       | 0.35   | 0.001 | 0.22           | 0.001 | 0.32     | 0.001 | -              | -     |
| 15. Three ex- <i>G. difficilis</i> ", balanced by vampire                      | Weighted Bray-Curtis   | 0.53    | 0.002 | -              | -     | 0.60   | 0.001 | 0.17           | 0.015 |          |       |                |       |
| N = 18                                                                         | Unweighted Bray-Curtis | 0.50    | 0.002 | -              | -     | 0.60   | 0.001 | 0.17           | 0.018 |          |       |                |       |
|                                                                                | Weighted UniFrac       | 0.47    | 0.003 | -              | -     | 0.49   | 0.001 | 0.19           | 0.017 |          |       |                |       |
|                                                                                | Unweighted UniFrac     | 0.50    | 0.002 | -              | -     | 0.56   | 0.001 | 0.13           | 0.087 |          |       |                |       |
| 16. Herbivorous finches, Santa Cruz, dry season, ~balanced species**           | Weighted Bray-Curtis   | 0.28    | 0.025 | 0.30           | 0.03  |        |       |                |       |          |       |                |       |
| N = 10                                                                         | Unweighted Bray-Curtis | 0.41    | 0.003 | 0.32           | 0.008 |        |       |                |       |          |       |                |       |
|                                                                                | Weighted UniFrac       | 0.12    | 0.20  | 0.24           | 0.28  |        |       |                |       |          |       |                |       |
|                                                                                | Unweighted UniFrac     | 0.29    | 0.017 | 0.25           | 0.14  |        |       |                |       |          |       |                |       |
| 17. <i>G. septentrionalis</i> , balanced by island                             | Weighted Bray-Curtis   |         |       |                |       | 0.16   | 0.001 | 0.093          | 0.001 |          |       |                |       |
| N = 30                                                                         | Unweighted Bray-Curtis |         |       |                |       | 0.21   | 0.001 | 0.11           | 0.001 |          |       |                |       |
|                                                                                | Weighted UniFrac       |         |       |                |       | 0.18   | 0.002 | 0.11           | 0.001 |          |       |                |       |
|                                                                                | Unweighted UniFrac     |         |       |                |       | 0.23   | 0.001 | 0.092          | 0.001 |          |       |                |       |
| 18. <i>G. fuliginosa</i> & <i>G. fortis</i> , wet season, balanced by island** | Weighted Bray-Curtis   | 0.16    | 0.18  | 0.09           | 0.75  | -0.11  | 0.73  | 0.13           | 0.38  |          |       |                |       |
| N = 10                                                                         | Unweighted Bray-Curtis | 0.15    | 0.16  | 0.10           | 0.59  | 0.15   | 0.16  | 0.13           | 0.37  |          |       |                |       |
|                                                                                | Weighted UniFrac       | 0.13    | 0.22  | 0.14           | 0.26  | 0.13   | 0.22  | 0.13           | 0.35  |          |       |                |       |
|                                                                                | Unweighted UniFrac     | 0.16    | 0.18  | 0.12           | 0.43  | 0.16   | 0.18  | 0.13           | 0.28  |          |       |                |       |
| 19. <i>G. fuliginosa</i> & <i>G. fortis</i> , dry season, balanced by island** | Weighted Bray-Curtis   | 0.25    | 0.10  | 0.10           | 0.05  | 0.32   | 0.004 | 0.15           | 0.002 |          |       |                |       |
| N = 14                                                                         | Unweighted Bray-Curtis | 0.25    | 0.11  | 0.11           | 0.03  | 0.29   | 0.005 | 0.16           | 0.002 |          |       |                |       |
|                                                                                | Weighted UniFrac       | 0.16    | 0.19  | 0.067          | 0.28  | 0.43   | 0.010 | 0.22           | 0.008 |          |       |                |       |
|                                                                                | Unweighted UniFrac     | 0.23    | 0.11  | 0.089          | 0.11  | 0.26   | 0.014 | 0.13           | 0.005 |          |       |                |       |
